# Supplementary material
Source: MDPI journal article supplement (https://www.mdpi.com/2072-4292/15/6/1643)
Supplement: s1 [file s1]

Supporting Information for

**Major Elements Concentrations in Chang'E-3 Landing Site**

**from Active Particle-induced X-ray Spectrometer**

by Ng et al.

**Supplementary Table S1.** IDs of CE-3 APXS data.

|                                                               |
|---------------------------------------------------------------|
| CE3_BMYK_PIXS-E_SCI_N_20131221124501_20131223174500_0005_A.2B |
| CE3_BMYK_PIXS-E_SCI_N_20131223174501_20131226000000_0006_A.2B |
| CE3_BMYK_PIXS-E_SCI_N_20131226000001_20140112193800_0007_A.2B |
| CE3_BMYK_PIXS-E_SCI_N_20140112193801_20140114213300_0008_A.2B |
